# Supplementary material for: A combination of a graphene quantum dots–cationic red dye donor–acceptor pair and cucurbit[7]uril as a supramolecular sensor for ultrasensitive detection of cancer biomarkers spermine and spermidine
Source: Royal Society of Chemistry journal article supplement (doi:10.1039/d2tb01269c), 2022-01-01
Supplement: d2tb01269c1.pdf [file d2tb01269c1.pdf]

## Supporting Information

### A Combination of Graphene Quantum Dots-Cationic Red Dye Donor-Acceptor Pair and Cucurbit[7]uril as Supramolecular Sensor for Ultrasensitive Detection of Cancer Biomarkers Spermine and Spermidine

Akhil A. Bhosle,<sup>a</sup> Mainak Banerjee,<sup>\*a</sup> Sharanabasava D. Hiremath,<sup>a</sup> Dilawar S. Sisodiya,<sup>a</sup> Viraj G. Naik,<sup>a</sup> Nilotpal Barooah,<sup>b</sup> Achikanath C. Bhasikuttan,<sup>b,c</sup> Anjan Chattopadhyay,<sup>a</sup> Amrita Chatterjee<sup>\*a</sup>

<sup>a</sup>Department of Chemistry, BITS Pilani, K. K. Birla Goa Campus, NH 17B Bypass Road, Zuarinagar, Goa 403726, INDIA

<sup>b</sup>Radiation & Photochemistry Division, Bhabha Atomic Research Centre, Trombay, Mumbai, INDIA

<sup>c</sup>Homi Bhabha National Institute, Anushaktinagar, Mumbai, INDIA

Corresponding Authors

\*E-mail: mainak@goa.bits-pilani.ac.in. Phone: +91-832-2580-347. Fax: +91-832-255-7031 (M.B.).

\*E-mail: amrita@goa.bits-pilani.ac.in. Phone: +91-832-2580-320. Fax: +91-832-255-7031 (A.C.).

#### Table of Contents

| Sr. No. | Contents                                                                                                                                               | Page No. |
|---------|--------------------------------------------------------------------------------------------------------------------------------------------------------|----------|
| 1.      | Synthesis of hydroxy graphene quantum dots (HO-GQDs)                                                                                                   | S3       |
| 2.      | IR spectra of GQDs (Figure S1)                                                                                                                         | S3       |
| 3.      | UV-vis and fluorescence response of <b>BPBP</b> at different pH (Figure S2)                                                                            | S4       |
| 4.      | Fluorescence response of GQDs + <b>BPBP</b> upon addition of CB[7] (Figure S3)                                                                         | S5       |
| 5.      | DFT optimized structures of <b>BPBP</b> and GQDs (Figure S4)                                                                                           | S6       |
| 6.      | Predicted absorption peaks of the components in different forms at the TDDFT level (Table S1)                                                          | S7       |
| 7.      | Predicted electron cloud for GQDs-BPBP complexes in HOMO and LUMO states at TDDFT level (Table S2)                                                     | S7-S8    |
| 8.      | Fluorescence response of <b>BPBP</b> upon addition of CB[7] (Figure S5)                                                                                | S8       |
| 9.      | Fluorescence response of <b>BPBP</b> + CB[7] upon addition of spermidine (Figure S6)                                                                   | S9       |
| 10.     | Fluorescence responses of <b>BPBP</b> + CB[7] with various biogenic amines, metal ions, anions, amino acids, and neutral molecules (Figures S7 and S8) | S9-S10   |
| 11.     | Job's plot for the stoichiometry of spermine and spermidine with CB[7]                                                                                 | S10      |

|     |                                                                                                                                                   |         |
|-----|---------------------------------------------------------------------------------------------------------------------------------------------------|---------|
|     | in two-component assembly (Figure S9)                                                                                                             |         |
| 12. | UV-vis responses of <b>BPBP</b> on the addition of CB[7] and further upon addition of spermine and spermidine (Figure S10)                        | S11     |
| 13. | Fluorescence response of GQDs + <b>BPBP</b> + CB[7] upon addition of spermidine and at a lower concentration range (LOD study) (Figure S11)       | S11     |
| 14. | UV-vis responses of GQDs upon addition of <b>BPBP</b> and CB[7] and further upon addition of spermine and spermidine (Figure S12)                 | S12     |
| 15. | Percentage fluorescence quenching of the supramolecular assembly with various metal ions, anions, amino acids, and neutral molecules (Figure S13) | S13     |
| 16. | Effect of pH on the relative emission intensities of the sensing assembly in the presence and absence of spermine (Figure S14)                    | S14     |
| 17. | Time-resolved spectroscopy data for two-component sensing assembly (Table S3)                                                                     | S14     |
| 18. | ITC study for the stoichiometry of CB[7] with <b>BPBP</b> (Figure S15)                                                                            | S15     |
| 19. | Job's plot for the stoichiometry of spermidine with CB[7] in three-component assembly (Figure S16)                                                | S16     |
| 20. | DFT optimized structures of CB[7]:SP (Figure S17)                                                                                                 | S16     |
| 21. | Time-resolved spectroscopy data for three-component sensing assembly (Table S4)                                                                   | S17     |
| 22. | DLS for three-component sensing assembly (Figure S18)                                                                                             | S18     |
| 23. | Zeta potential for three-component sensing assembly (Table S5)                                                                                    | S18     |
| 24. | Vapor phase sensing of SP/SPD by two-component and three-component sensing systems (Figure S19)                                                   | S19     |
| 25. | Vapor phase SP/SPD recovery data for the two-component and three-component supramolecular sensor (Table S6)                                       | S20     |
| 26. | Comparative study for dye-cavitand host-guest sensors of SP/SPD (Table S7)                                                                        | S21-S22 |
| 27. | Comparative study for selected supramolecular sensing strategies for SP/SPD. (Table S8)                                                           | S23-S24 |
| 28. | References                                                                                                                                        | S25-S27 |
| 29. | NMR Spectra                                                                                                                                       | S28-S29 |

## Experimental Procedure

**Synthesis of hydroxy graphene quantum dots (HO-GQDs):**<sup>1</sup> Pyrene (0.2 g) was refluxed in conc. HNO<sub>3</sub> (16 mL) at 95 °C for 12 h. The mixture was then cooled to room temperature and diluted with 100 mL of deionized water, and filtered to obtain yellow 1,3,6- trinitropyrene (0.26 g). Next, the yellow product was dispersed in a 60 mL of 0.2 M NaOH solution by ultrasonication for 2 h. Then the suspension was transferred to a Teflon autoclave container and heated at 200 °C for 10 h. The product containing water-soluble GQDs was filtered through a 0.22 μm microporous membrane to remove insoluble carbon product after cooling to room temperature and further dialyzed in a dialysis bag (retained molecular weight: 10,000 Da) for 2 days to remove sodium salt and unfused small molecules. The purified black OH-GQDs were dried at 80 °C and characterized using standard techniques.

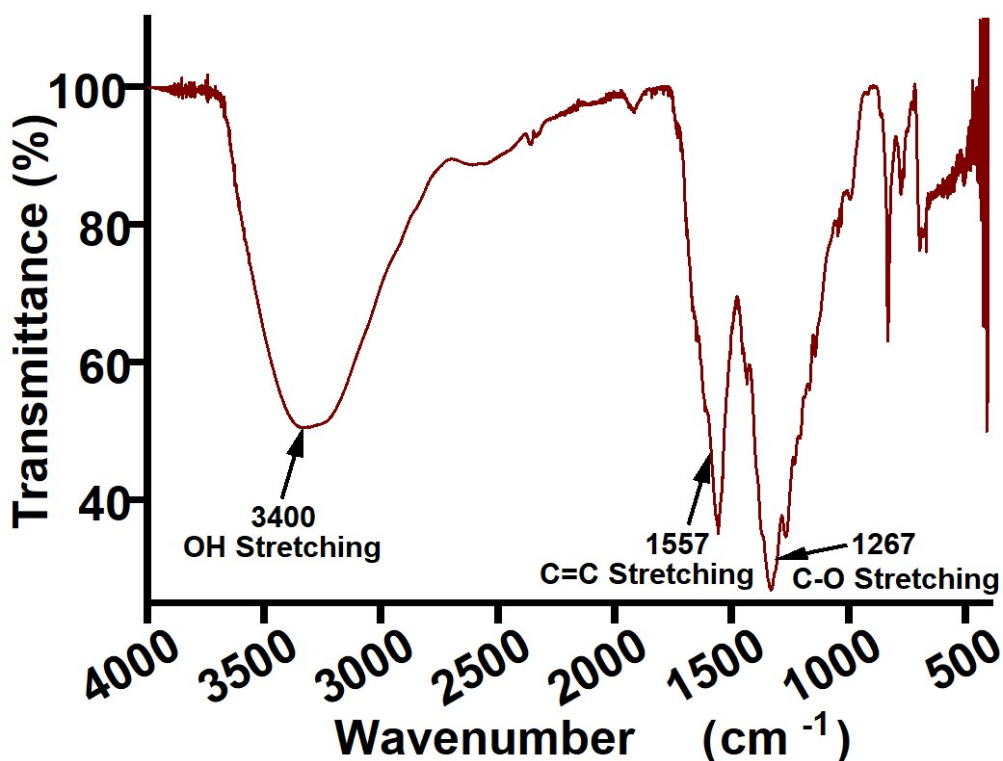

**Figure S1.** IR spectra confirm the presence of hydroxyl groups in the HO-GQDs.

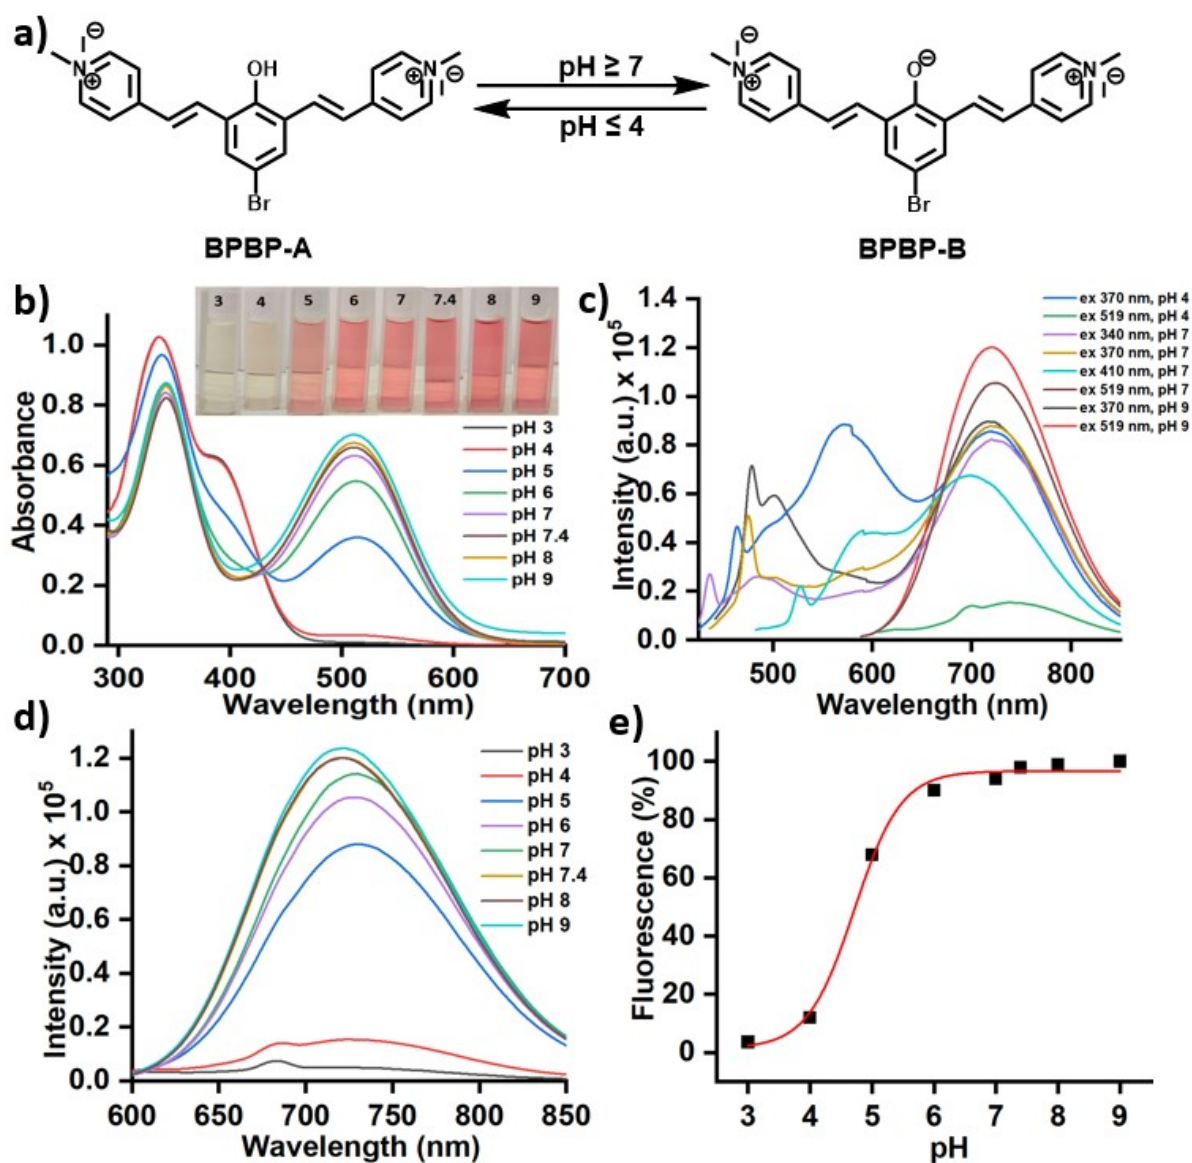

**Figure S2.** (a) Protonated and deprotonated forms of **BPBP**; (b) Response of **BPBP** at different pH in UV-vis; (c) fluorimetric responses of **BPBP** at different excitation wavelengths and pH; (d) Response of **BPBP** at different pH in fluorimetric studies; (e) Plot of % fluorescence v/s pH for determination of  $pK_a$ .

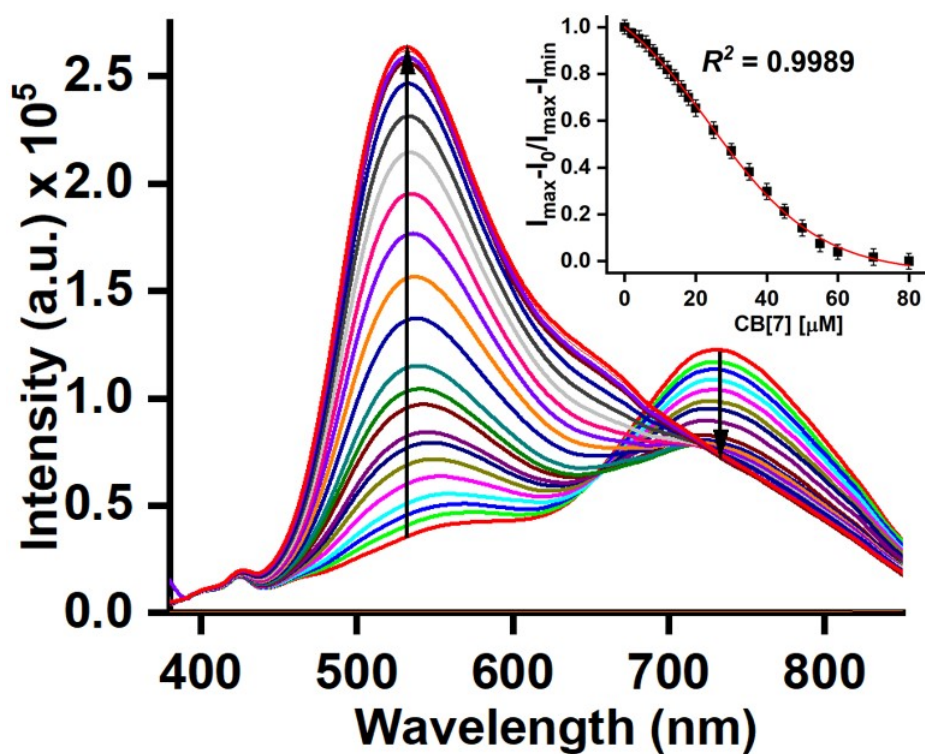

**Figure S3.** The fluorimetric responses of GQDs (5  $\mu\text{L}$ , 1 mg/mL) + **BPBP** (30  $\mu\text{M}$ ) upon the addition of CB[7] (0-100  $\mu\text{M}$ ) showed an increase in intensity at 535 nm and a simultaneous ratiometric decrease in intensity at 730 nm [GQDs:  $\lambda_{\text{ab}}$  370 nm,  $\lambda_{\text{em}}$  545 nm; **BPBP**:  $\lambda_{\text{ab}}$  519 nm,  $\lambda_{\text{em}}$  730 nm].

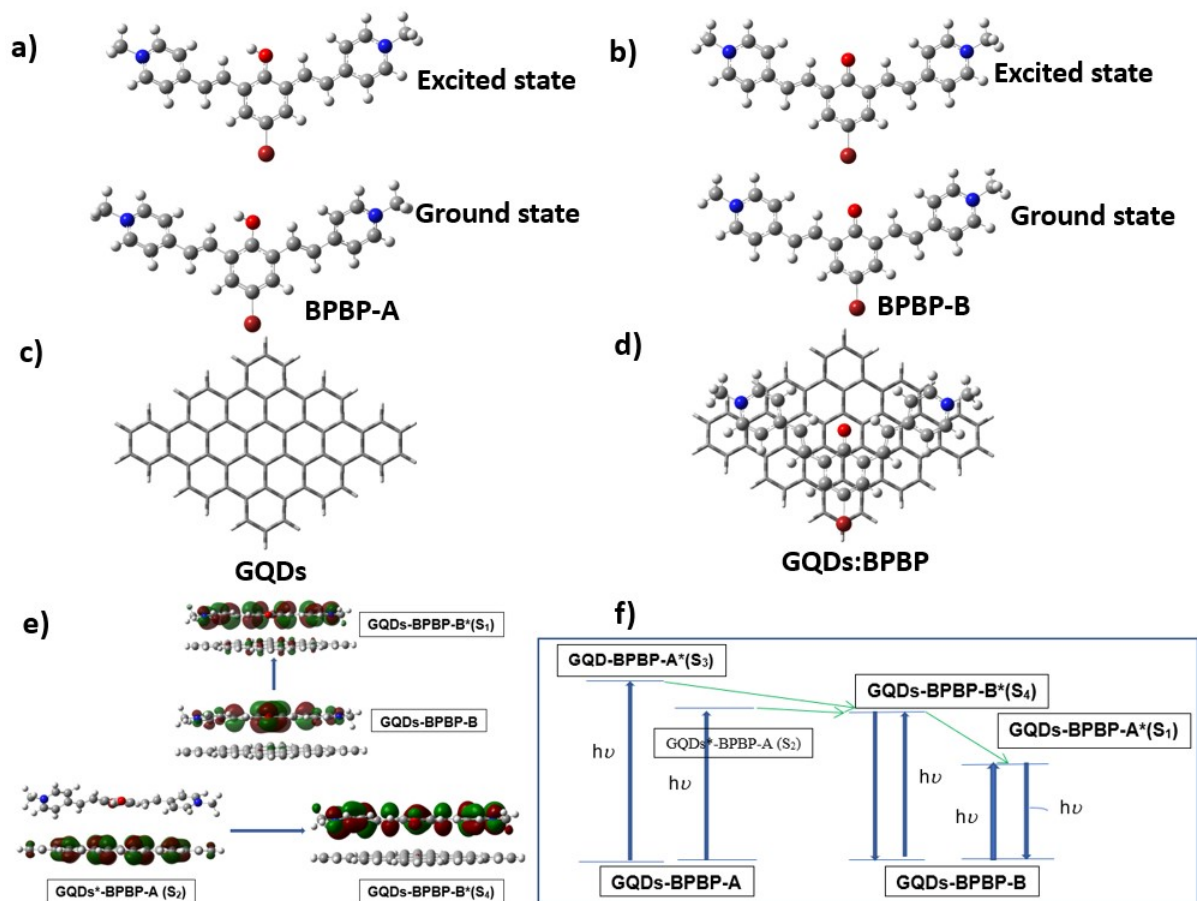

**Figure S4.** Optimized structures of (a) ground state and excited state **BPBP-A**; (b) ground state and excited state **BPBP-B**; (c) GQDs; (d) GQDs:BPBP complex top view; (e) HOMO  $\rightarrow$  LUMO excitation of GQDs-BPBP-B which dominates the 526 nm peak ( $S_0$ - $S_1$ ) and LUMO+2 orbitals GQDs-BPBP-A and GQDs-BPBP-B involved in the quenching of GQDs fluorescence and (f) A schematic representation of the fate of photo-excitations of GQDs-BPBP-A and GQDs-BPBP-B.

**Table S1.** Predicted absorption peak positions (with oscillator strength of the transition and dominating excitations in %) and emission peak positions of **BPBP** forms in water at TDDFT level.

|                           | Predicted Absorption peak positions (at TDDFT) $\lambda_{\text{abs}}$ (nm) | Oscillator strength of the transition | Contributed by excitations (with major contributions in %)            |
|---------------------------|----------------------------------------------------------------------------|---------------------------------------|-----------------------------------------------------------------------|
| <b>BPBP-A</b>             | 361 ( $\lambda_{\text{em}} = 464$ nm)                                      | 1.6992                                | H→L (73%), H-1→L (13%)                                                |
| <b>BPBP-B</b>             | 550<br>400 ( $\lambda_{\text{em}} = 708$ nm)                               | 1.3620<br>0.1940                      | H→L (89%)<br>H→L+1 (67%), H-1→L (26%)                                 |
| <b>BPBP-A-CB[7] (1:1)</b> | 416<br>343                                                                 | 0.8893<br>0.6318                      | H→L (83%)<br>H-1→L (75%)                                              |
| <b>BPBP-A-CB[7] (2:1)</b> | 399<br>351                                                                 | 0.898<br>0.1029                       | H→L (65%), H→L+1 (11%)<br>H→L+1 (55%), H-1→L (22%)                    |
| <b>GQDs</b>               | 376                                                                        | 0.3222                                |                                                                       |
| <b>GQDs-BPBP-A</b>        | 376<br>350                                                                 | 0.2786<br>0.4137                      | H→L+2 (76%), H-1→L+3 (14%)<br>H-3→L (55%), H-4→L (16%), H-5→L+1 (10%) |
| <b>GQDs-BPBP-B</b>        | 526<br>378<br>365                                                          | 0.6896<br>0.1959<br>0.1019            | H→L (84.5%)<br>H→L+2 (66%), H-4→L(15%)<br>H→L+1 (72%)                 |

**Table S2.** Some important orbitals of GQDs-BPBP-A and GQDs-BPBP-B contributing to the mentioned absorption peaks

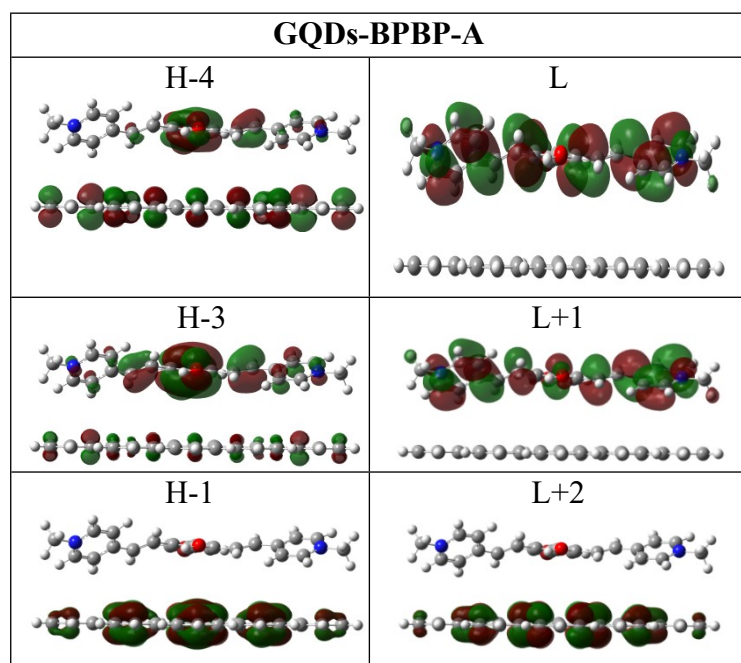



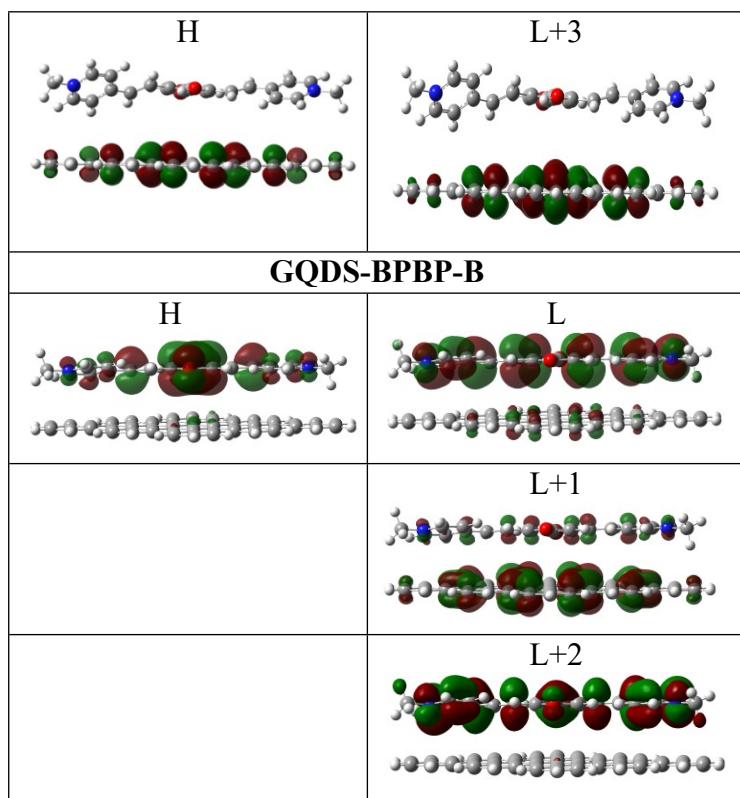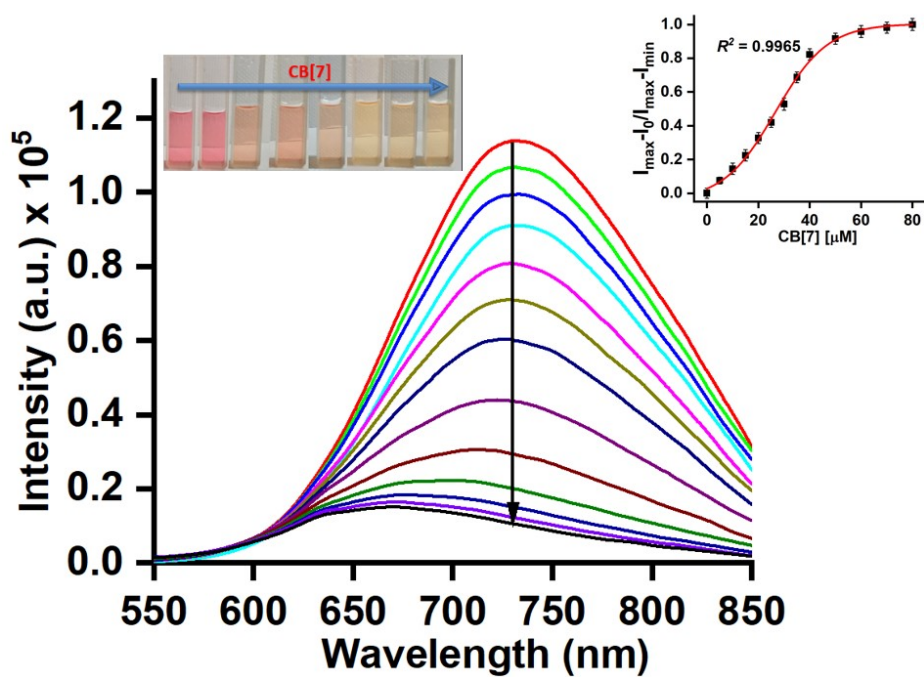

**Figure S5.** Fluorescence response of **BPBP** (30  $\mu\text{M}$ ) upon addition of **CB[7]** (0-80  $\mu\text{M}$ ) shows a decrease in intensity along with a visual color change from red to yellow [ $\lambda_{\text{ex}}$  519 nm,  $\lambda_{\text{em}}$  730 nm].



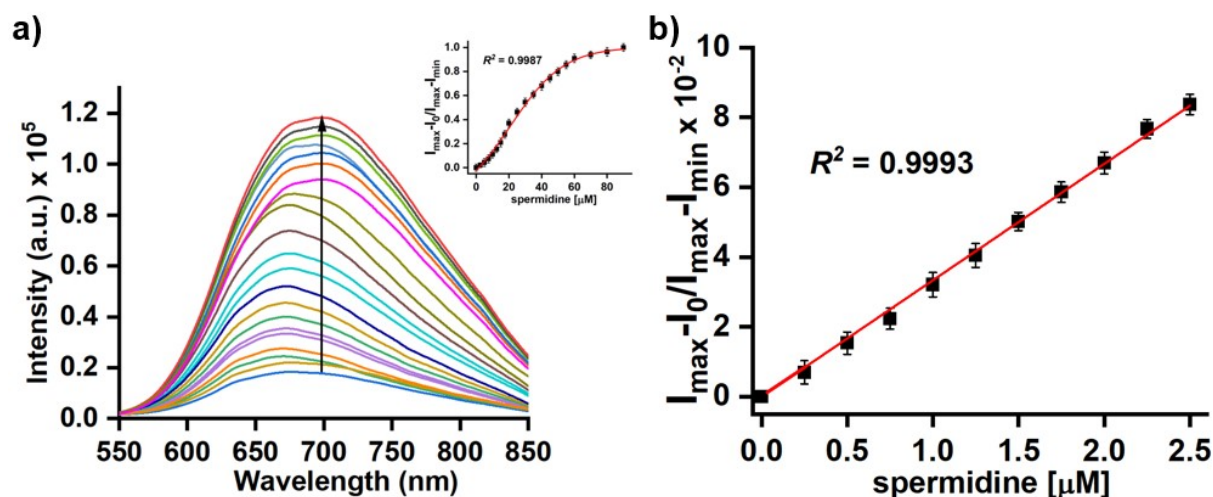

**Figure S6.** (a) Fluorescence response of **BPBP** (30  $\mu\text{M}$ ) + **CB[7]** (60  $\mu\text{M}$ ) upon addition of spermidine (0-80  $\mu\text{M}$ ) [ $\lambda_{\text{ex}}$  519 nm,  $\lambda_{\text{em}}$  730 nm]; (b) Fluorescence response of sensing assembly containing 30  $\mu\text{M}$  **BPBP** at the lower concentration range for spermidine (0–2.5  $\mu\text{M}$ ) [ $\lambda_{\text{ex}}$  519 nm,  $\lambda_{\text{em}}$  730 nm].

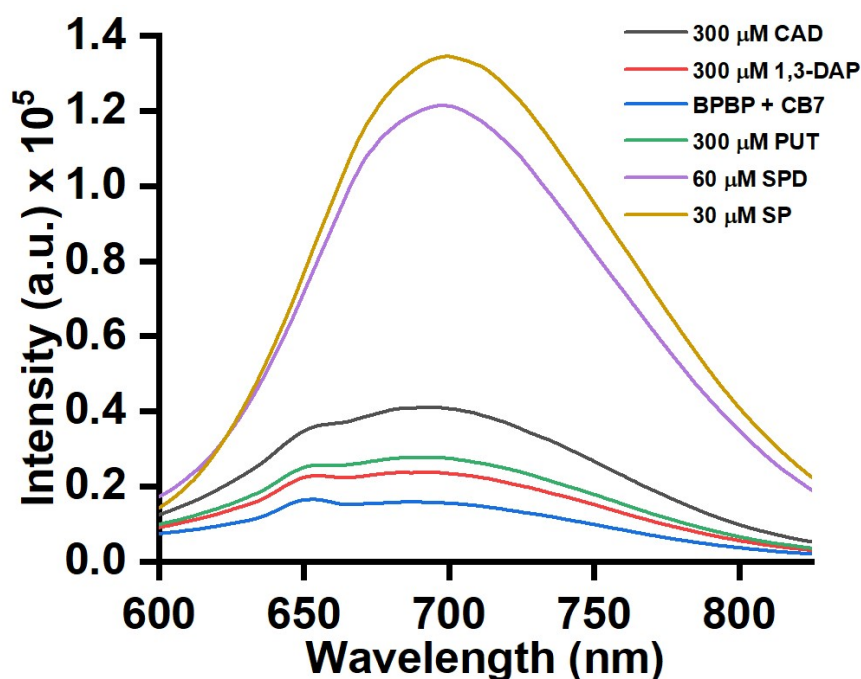

**Figure S7.** Fluorescence response of the two-component supramolecular assembly against biogenic amines [ $\lambda_{\text{ex}}$  519 nm,  $\lambda_{\text{em}}$  730 nm].

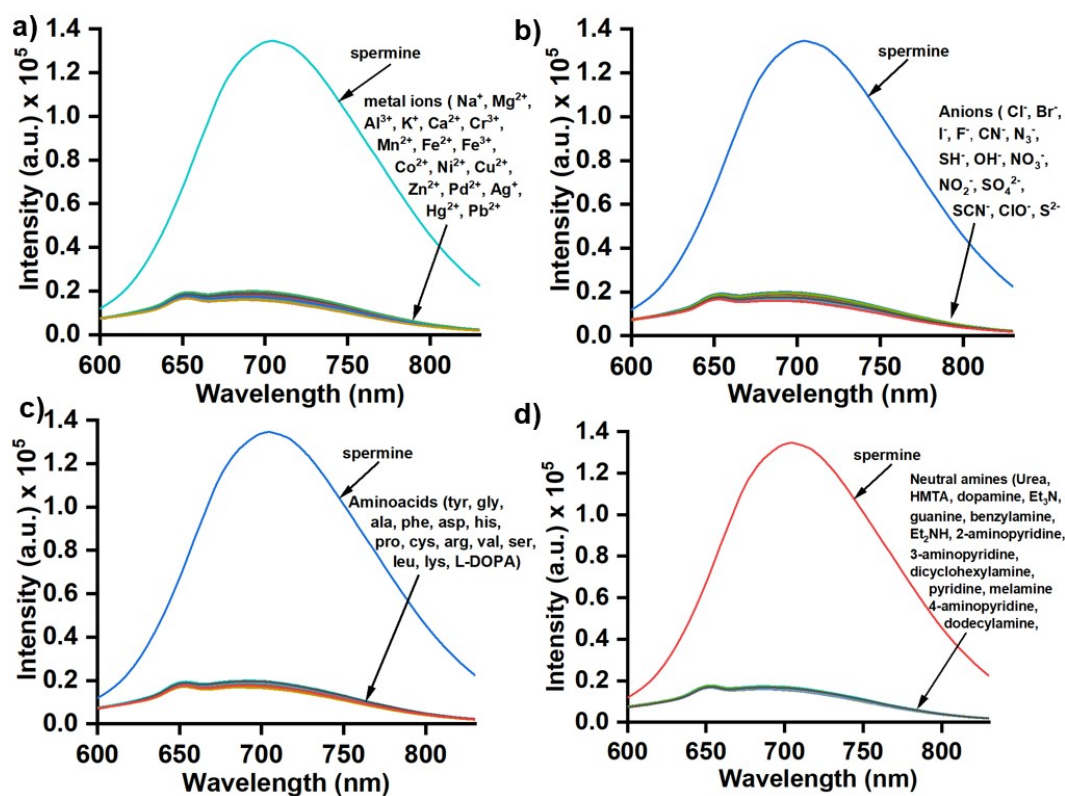

**Figure S8.** Fluorescence response of the two-component supramolecular assembly against (a) metal ions; (b) anions; (c) amino-acids; (d) neutral molecules [ $\lambda_{\text{ex}}$  519 nm,  $\lambda_{\text{em}}$  730 nm].

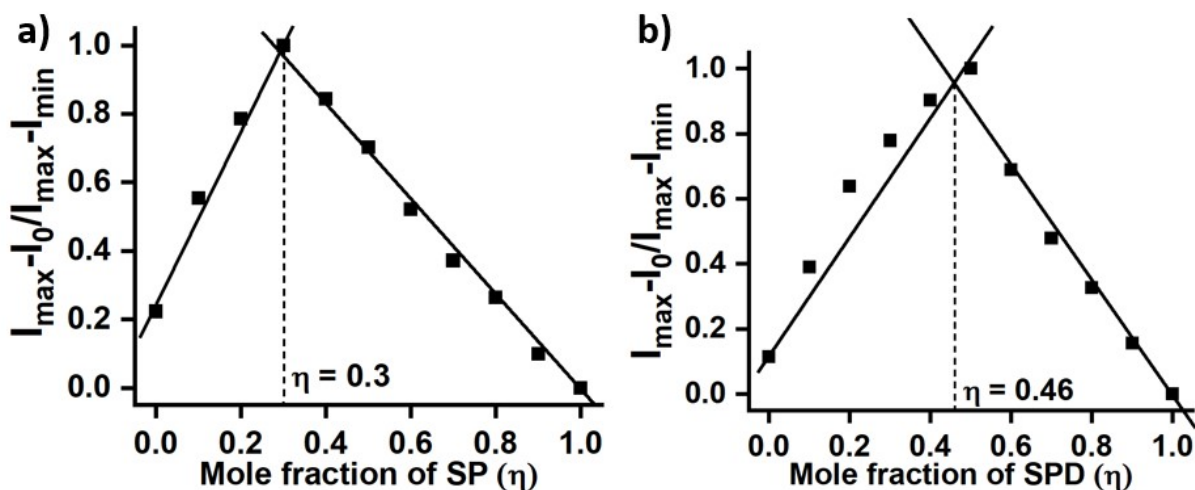

**Figure S9.** Job's plot for the determination of the stoichiometry of BPBP:CB[7] two-component assembly [BPBP (30  $\mu\text{M}$ ), CB[7] and SP/SPD concentration varied between 0-30  $\mu\text{M}$  ( $\lambda_{\text{ex}}$  519 nm;  $\lambda_{\text{em}}$  730 nm)].

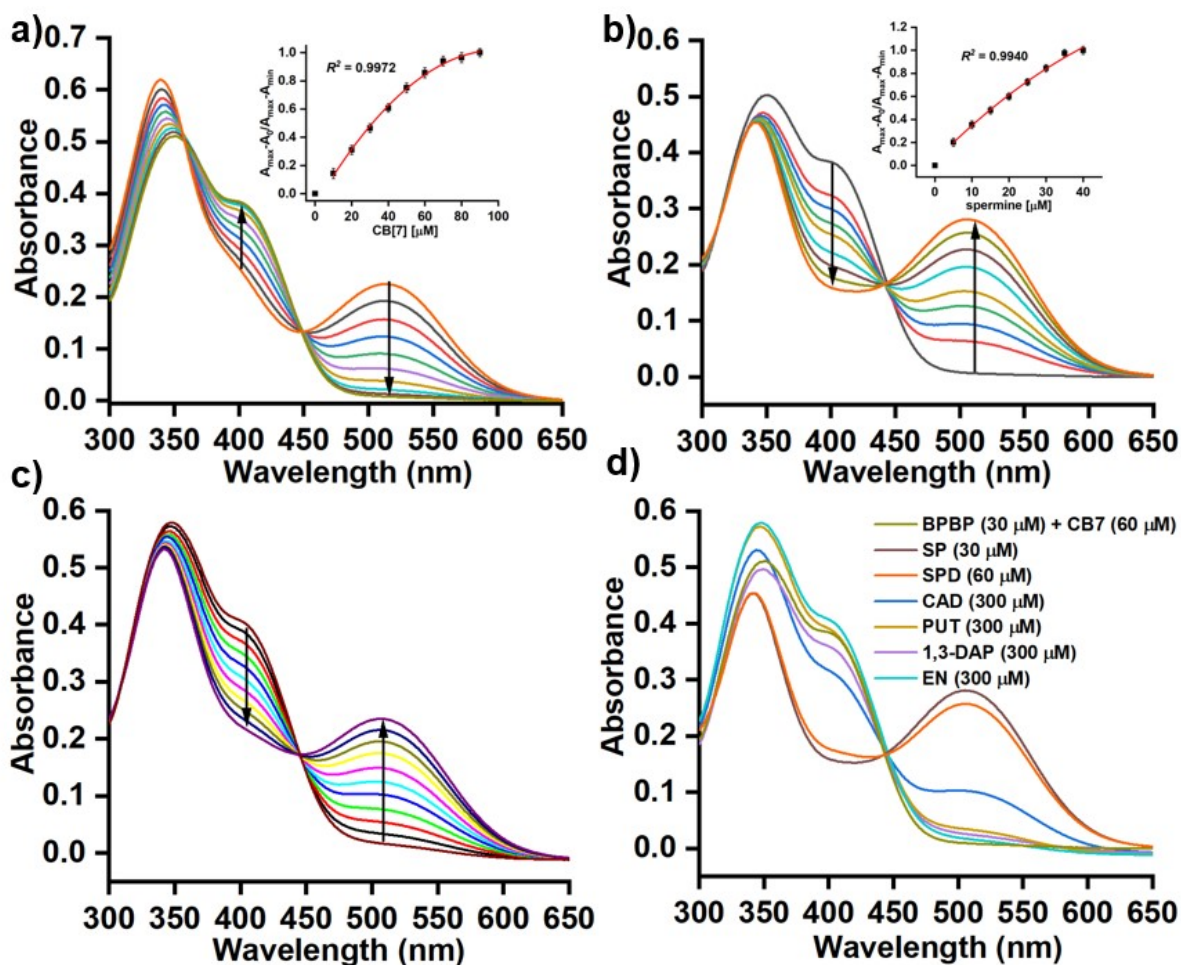

**Figure S10.** UV-vis spectra of (a) **BPBP** (30  $\mu\text{M}$ ) upon addition of **CB[7]** (0-100  $\mu\text{M}$ ); (b) **BPBP** (30  $\mu\text{M}$ ) + **CB[7]** (60  $\mu\text{M}$ ) upon addition of spermine (0-40  $\mu\text{M}$ ); (c) **BPBP** (30  $\mu\text{M}$ ) + **CB[7]** (60  $\mu\text{M}$ ) upon addition of spermidine (0-70  $\mu\text{M}$ ) in water; (d) Response of the two-component supramolecular assembly against biogenic amines.

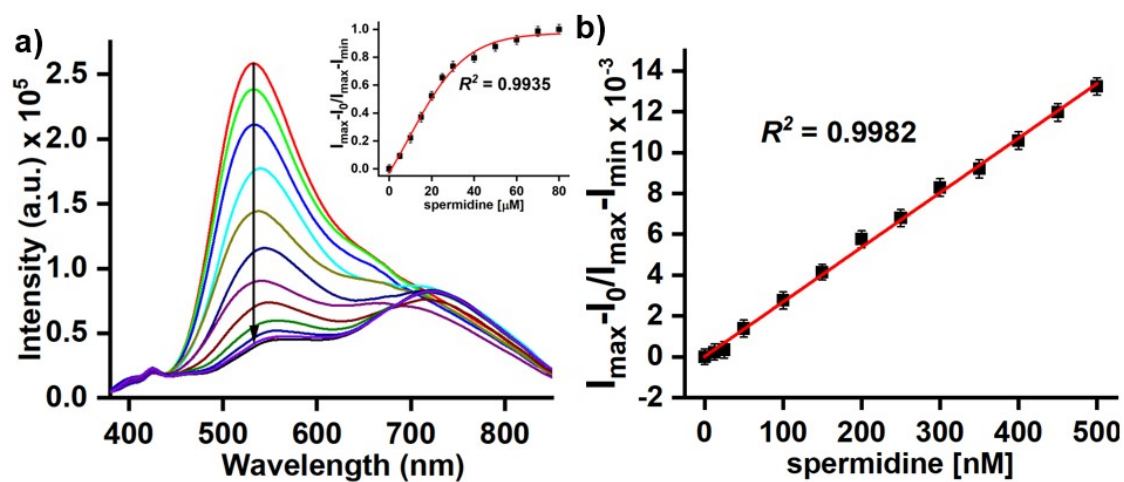

**Figure S11.** (a) Fluorescence response of GQDs (5  $\mu$ L, 1 mg/mL) + **BPBP** (30  $\mu$ M) + CB[7] (60  $\mu$ M) upon addition of spermidine (0-80  $\mu$ M); (b) Fluorescence response of sensing assembly containing 30  $\mu$ M **BPBP** at the lower concentration range for spermidine (0–500 nM) (LOQ = 12.5 nM, LOD = 0.9 ppb) (GQDs  $\lambda_{ex}$  370 nm,  $\lambda_{em}$  545 nm; **BPBP**  $\lambda_{em}$  730 nm).

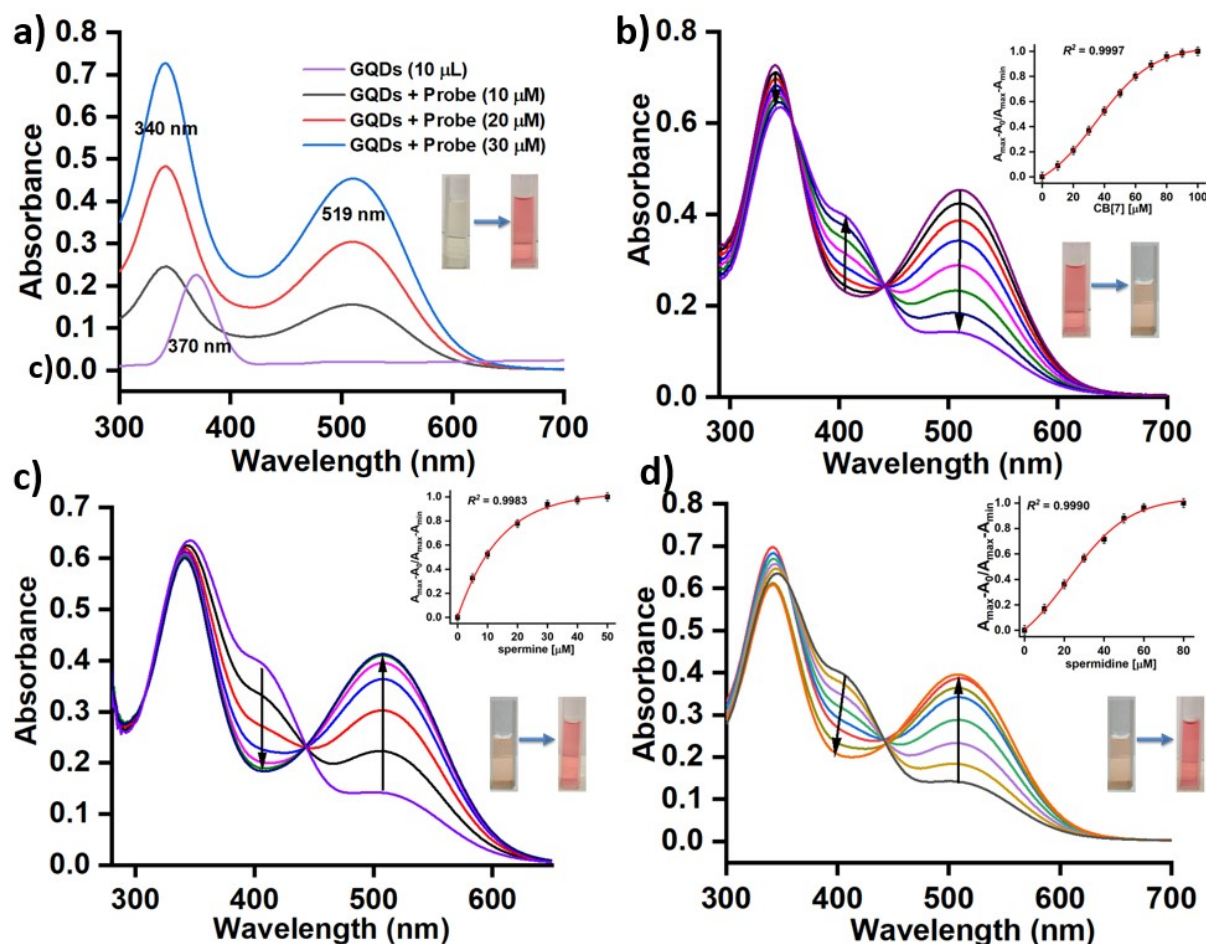

**Figure S12.** UV-vis spectra of GQDs upon addition of (a) **BPBP** (0-30  $\mu$ M); (b) **BPBP** (30  $\mu$ M) + CB[7] (0-100  $\mu$ M); (c) **BPBP** (30  $\mu$ M) + CB[7] (60  $\mu$ M) + spermine (0-40  $\mu$ M); (d) **BPBP** (30  $\mu$ M) + CB[7] (60  $\mu$ M) + spermidine (0-80  $\mu$ M) in water.



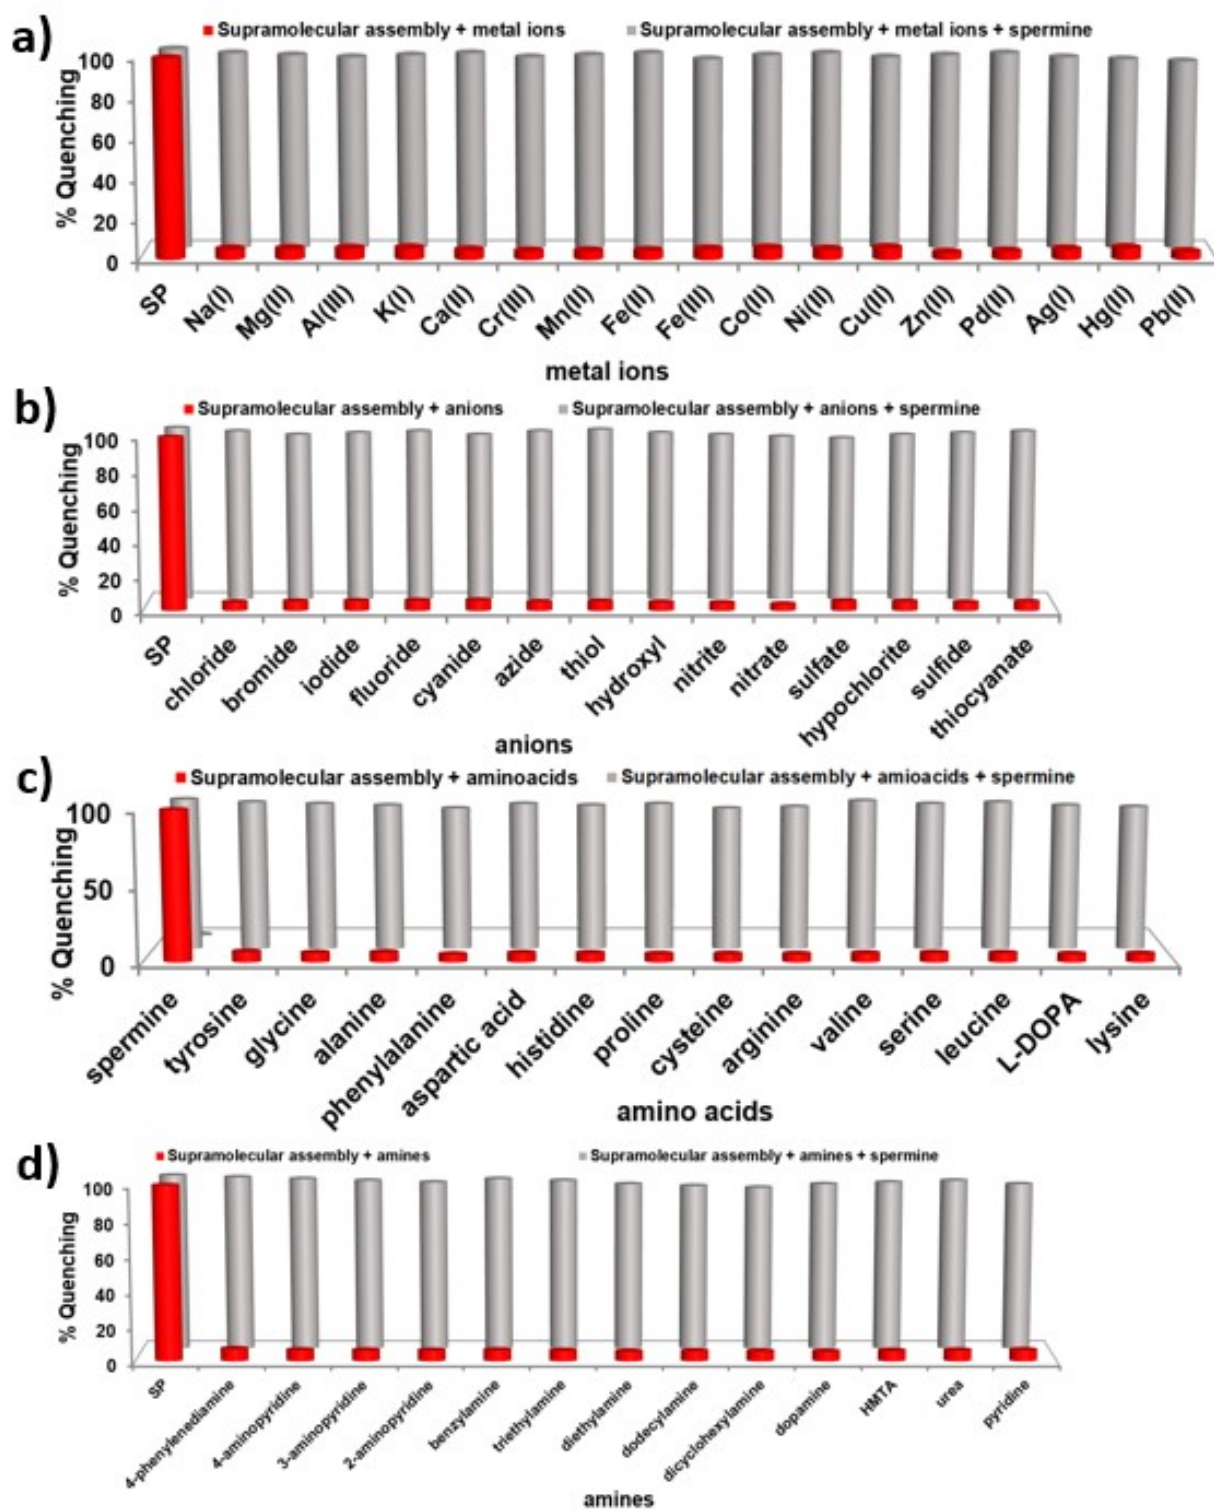

**Figure S13.** Percentage fluorescence quenching of the supramolecular assembly (at  $\lambda_{em}$  535 nm) with (a) metal ions; (b) anions; (c) amino acids; (d) neutral molecules [red bars]; and corresponding competitive study in the presence of spermine (30  $\mu$ M) [grey bars].

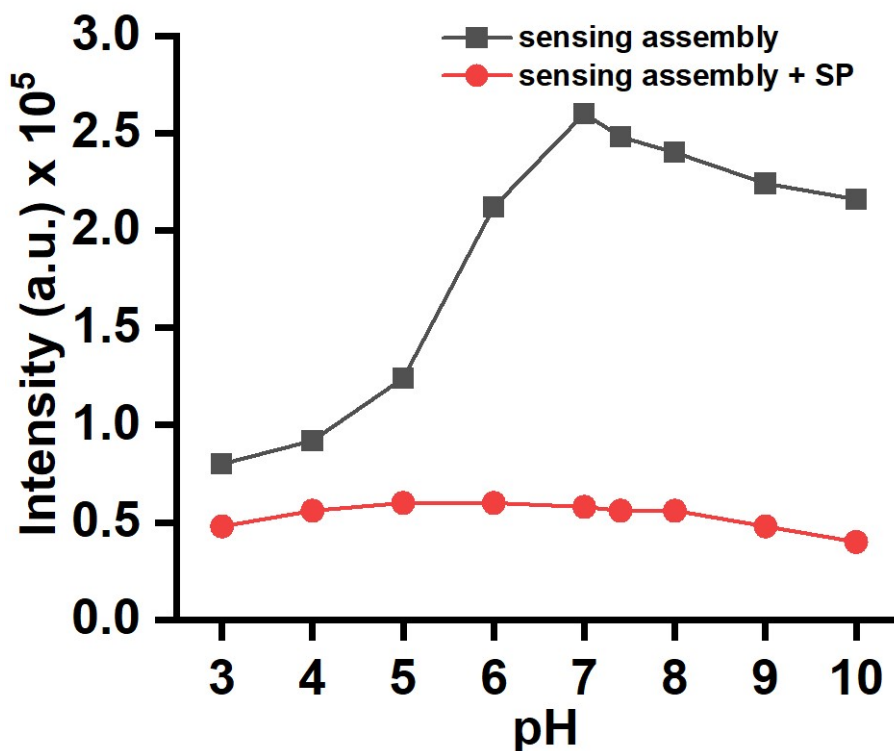

**Figure S14.** Effect of pH on the relative emission intensities of GQDs:BPBP:CB[7] supramolecular sensing assembly containing 30  $\mu\text{M}$  BPBP; and sensing assembly upon addition of spermine (30  $\mu\text{M}$ ) [ $\lambda_{\text{ex}}$  370 nm,  $\lambda_{\text{em}}$  535 nm].

**Table S3.** Life-time decay trace of BPBP, BPBP + CB[7], and BPBP + CB[7] upon addition of spermine.

| System                                                                                   | $\tau_1/\text{ns}$ (%) | $\tau_2/\text{ns}$ (%) | $\tau_3/\text{ns}$ (%) | $\chi^2$ | $\tau_{\text{av}}/\text{ns}$ |
|------------------------------------------------------------------------------------------|------------------------|------------------------|------------------------|----------|------------------------------|
| BPBP in water ( $\lambda_{\text{ex}}$ 511 nm, $\lambda_{\text{em}}$ 730 nm)              | 0.06 (82)              | 0.25 (13)              | 1.03(5)                | 1.20     | 0.133                        |
| BPBP + CB[7] in water ( $\lambda_{\text{ex}}$ 511 nm, $\lambda_{\text{em}}$ 730 nm)      | 0.14 (38)              | 0.85 (35)              | 2.63 (27)              | 1.24     | 1.061                        |
| BPBP + CB[7] + SP in water ( $\lambda_{\text{ex}}$ 511 nm, $\lambda_{\text{em}}$ 730 nm) | 0.07 (76)              | 0.24 (18)              | 1.01 (6)               | 1.30     | 0.157                        |

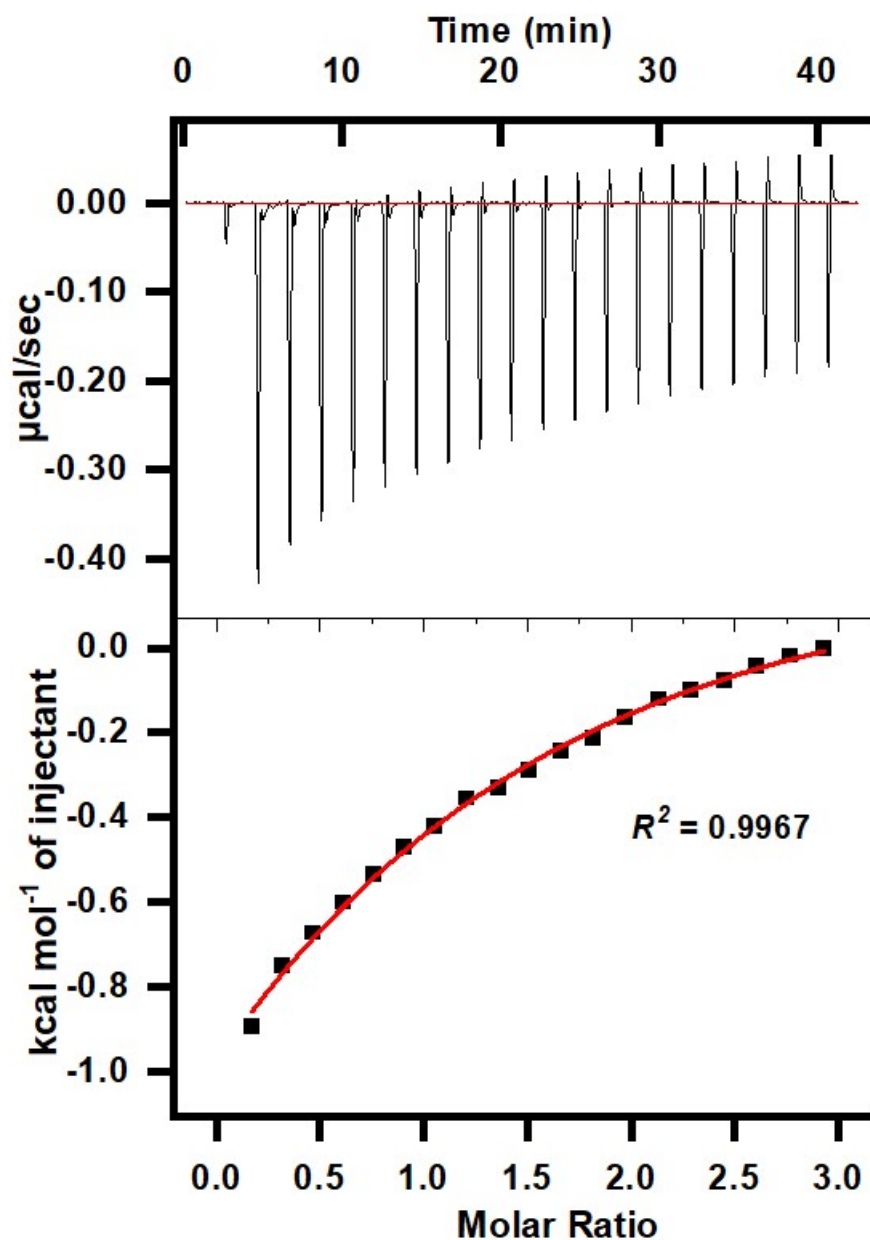

**Figure S15.** Isothermal calorimetric titration for host-guest complexation of **BPBP** and **CB[7]**. (A) Raw data for the titration of **CB[7]** with **BPBP** in the Tris.HCl buffer pH 7.4 at 25 °C, showing the calorimetric response as successive injections of the **CB[7]** are added to the sample cell. (B) The integrated heat profile of the calorimetric titration is shown in panel A. The solid line represents the best nonlinear least-squares fit in a 1:2 (**BPBP**:**CB[7]**) one-site binding model.



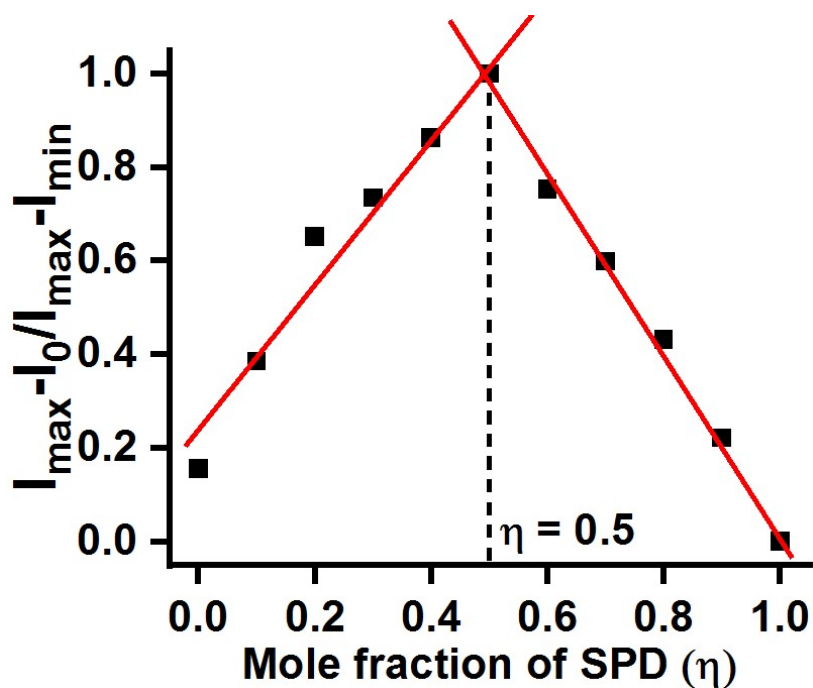

**Figure S16.** Job's plot for the determination of the stoichiometry of GQDs:BPBP:CB[7] three-component assembly [BPBP (30  $\mu$ M), GQDs 5  $\mu$ L, 1 mg/mL, CB[7] and SPD concentration varied between 0-30  $\mu$ M ( $\lambda_{\text{ex}}$  370 nm;  $\lambda_{\text{em}}$  535 nm).

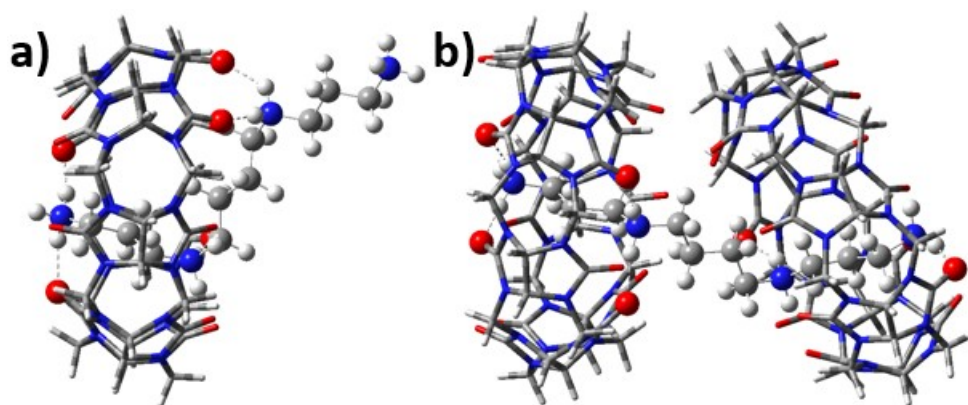

**Figure S17.** DFT optimized structures of 1:1 and 2:1 CB[7]:SP complex.

**Table S4.** Life-time decay trace of **BPBP**, GQDs:BPBP conjugate, GQDs:BPBPCB[7] assembly with different concentrations of spermine and spermidine.

| System                                                                             | $\tau_1/\text{ns}$ (%) | $\tau_2/\text{ns}$ (%) | $\tau_3/\text{ns}$ (%) | $\chi^2$ | $\tau_{\text{av}}/\text{ns}$ |
|------------------------------------------------------------------------------------|------------------------|------------------------|------------------------|----------|------------------------------|
| <b>BPBP</b> in water ( $\lambda_{\text{ex}}$ 511 nm, $\lambda_{\text{em}}$ 730 nm) | 0.06 (82)              | 0.25 (13)              | 1.03 (5)               | 1.20     | 0.133                        |
| GQDs ( $\lambda_{\text{ex}}$ 374 nm, $\lambda_{\text{em}}$ 535 nm)                 | 0.25 (27)              | 1.85 (34)              | 5.15 (39)              | 1.19     | 2.71                         |
| GQDs-BPBP ( $\lambda_{\text{ex}}$ 374 nm, $\lambda_{\text{em}}$ 535 nm)            | 0.22 (18)              | 0.85 (33)              | 2.81 (49)              | 1.06     | 1.69                         |
| GQDs-BPBP ( $\lambda_{\text{ex}}$ 374 nm, $\lambda_{\text{em}}$ 730 nm)            | 0.05(63)               | 0.36(20)               | 3.24 (17)              | 1.07     | 0.654                        |
| GQDs-BPBP-CB[7] ( $\lambda_{\text{ex}}$ 374 nm, $\lambda_{\text{em}}$ 535 nm)      | 0.07 (50)              | 0.48 (17)              | 3.76 (33)              | 1.06     | 1.36                         |
| GQDs-BPBP-CB[7]-SP ( $\lambda_{\text{ex}}$ 374 nm, $\lambda_{\text{em}}$ 535 nm)   | 0.20 (21)              | 1.32 (56)              | 4.46 (23)              | 1.2      | 1.81                         |

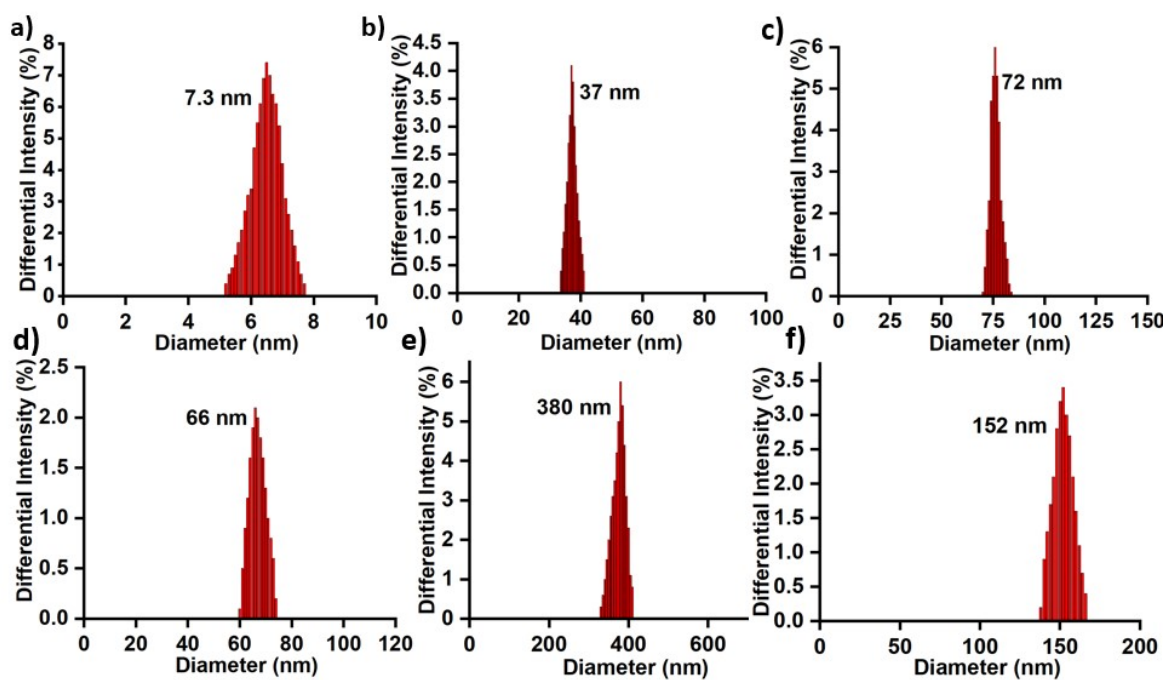

**Figure S18.** Particle size analysis of (a) GQDs; (b) BPBP; (c) CB[7]; (d) GQDs:BPBP conjugate; (e) GQDs:BPBP:CB[7] assembly; (f) after addition of spermine in the aqueous solution of the assembly.

**Table S5.** Zeta potential data for the individual components, binary conjugate, three-component sensing assembly, and sensing assembly upon the addition of spermine.

| Sample             | BPBP     | GQDs     | CB[7]     | Spermine | GQDs + BPBP | GQDs + BPBP + CB[7] | GQDs + BPBP + CB[7] + spermine |
|--------------------|----------|----------|-----------|----------|-------------|---------------------|--------------------------------|
| Zeta potential (ζ) | +5.07 mV | -7.35 mV | -12.03 mV | +0.45 mV | -1.54 mV    | -15.10 mV           | -7.64 mV                       |

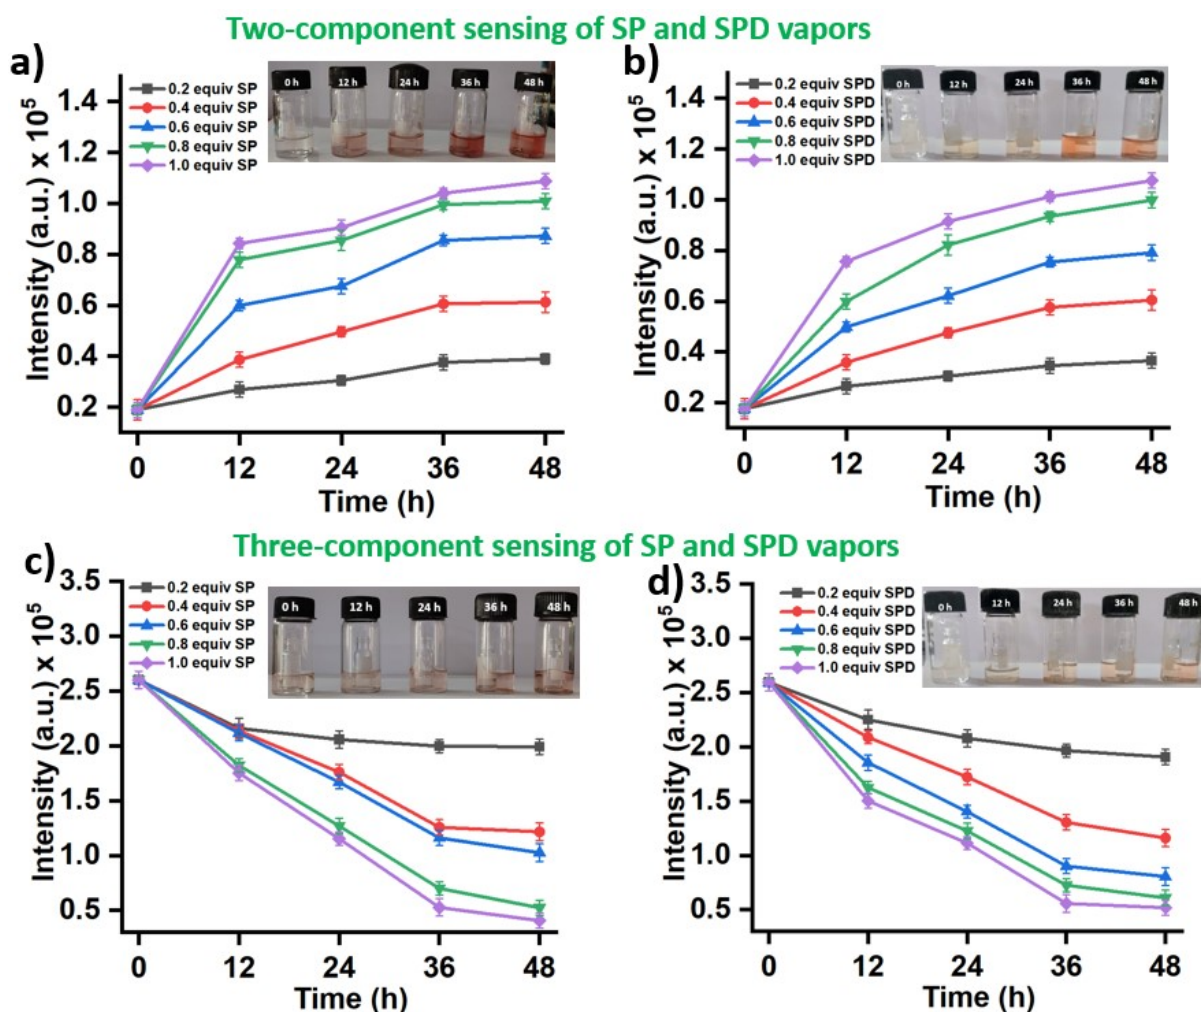

**Figure S19.** Time-dependent vapor phase sensing of spermine and spermidine at variable concentrations: The fluorescence responses from the two-component sensing assembly towards (a) spermine and (b) spermidine (**BPBP** (30  $\mu$ M) + **CB[7]** (60  $\mu$ M),  $\lambda_{\text{ex}}$  519 nm,  $\lambda_{\text{em}}$  730 nm); The fluorescence responses from three-component sensing assembly towards (c) spermine and (d) spermidine (**GQDs** (5  $\mu$ L, 1 mg/mL) + **BPBP** (30  $\mu$ M) + **CB[7]** (60  $\mu$ M,  $\lambda_{\text{ex}}$  370 nm,  $\lambda_{\text{em}}$  535 nm); Insets: Corresponding visual color change images for the two-component and three-component sensors towards SP/SPD vapors after addition of 1 equiv of SP and 2 equiv of SPD, respectively.

**Table S6.** Vapor phase SP/SPD recovery data for the two-component and three-component supramolecular sensor<sup>a</sup>

| Sr. No. | Sample                                                         | Spermine/<br>Spermidine<br>added ( $\mu\text{M}$ ) | Spermine/<br>Spermidine<br>found ( $\mu\text{M}$ ) | Recovery<br>(%) | RSD (%)<br>(n = 3) |
|---------|----------------------------------------------------------------|----------------------------------------------------|----------------------------------------------------|-----------------|--------------------|
| 1.      | Two-component assembly ( <b>BPBP</b> + CB[7]) + SP             | 06.0                                               | 05.011                                             | 83.5            | 2.7                |
|         |                                                                | 12.0                                               | 10.272                                             | 85.6            | 2.9                |
|         |                                                                | 18.0                                               | 15.102                                             | 83.9            | 3.4                |
|         |                                                                | 24.0                                               | 21.058                                             | 87.4            | 3.2                |
|         |                                                                | 30.0                                               | 25.530                                             | 85.1            | 3.0                |
| 2.      | Two-component assembly ( <b>BPBP</b> + CB[7]) + SPD            | 12.0                                               | 09.624                                             | 80.2            | 3.6                |
|         |                                                                | 24.0                                               | 19.560                                             | 81.5            | 2.9                |
|         |                                                                | 36.0                                               | 29.016                                             | 80.6            | 3.5                |
|         |                                                                | 48.0                                               | 40.080                                             | 83.5            | 2.4                |
|         |                                                                | 60.0                                               | 49.560                                             | 82.6            | 3.1                |
| 3.      | Three-component assembly<br>(GQDs + <b>BPBP</b> + CB[7]) + SP  | 06.0                                               | 05.412                                             | 90.2            | 2.8                |
|         |                                                                | 12.0                                               | 10.932                                             | 91.1            | 2.5                |
|         |                                                                | 18.0                                               | 16.128                                             | 89.6            | 3.3                |
|         |                                                                | 24.0                                               | 22.176                                             | 92.4            | 3.5                |
|         |                                                                | 30.0                                               | 27.450                                             | 91.5            | 3.1                |
| 4.      | Three-component assembly<br>(GQDs + <b>BPBP</b> + CB[7]) + SPD | 12.0                                               | 10.788                                             | 89.9            | 2.8                |
|         |                                                                | 24.0                                               | 20.520                                             | 85.5            | 2.7                |
|         |                                                                | 36.0                                               | 31.536                                             | 87.6            | 3.6                |
|         |                                                                | 48.0                                               | 42.672                                             | 88.9            | 2.8                |
|         |                                                                | 60.0                                               | 53.760                                             | 89.6            | 2.4                |

<sup>a</sup>The maximum fluorescence intensities from the sensing solutions at 730 nm for two-component and at 535 nm for three-component supramolecular sensors, respectively after 48 h were plotted on the standard curves to obtain the % recovery data.

**Table S7.** A comparative study for dye-cavitand host-guest sensors of spermine/spermidine.

| Sr. No. | Probe/dye Type                | Strategy (host)                             | Detection Medium              | Detection Limit  | Analyte (BPAs) | Interference by other BPAs | Application | Ref. No |
|---------|-------------------------------|---------------------------------------------|-------------------------------|------------------|----------------|----------------------------|-------------|---------|
| 1.      | Quinoline                     | host-guest<br>( $\beta$ -CD)                | Glass<br>Surface              | Not<br>Mentioned | SPD            | NO                         | serum       | 2       |
| 2.      | DASPI and<br>Hoechst<br>33258 | host-guest<br>(CB[n], $n = 6, 7, 8$ )       | Tris-HCl<br>buffer, pH<br>7.3 | Not<br>Mentioned | BPAs           | Yes                        | NA          | 3       |
| 3.      | PDI                           | host-guest<br>(CB[7])                       | Highly<br>acidic              | 30 nM            | SP             | SPD                        | NA          | 4       |
| 4.      | TPE                           | host-guest<br>(CB[7])                       | DMSO-H <sub>2</sub> O         | 1.0 $\mu$ M      | SP             | SPD, PUT                   | NA          | 5       |
| 5.      | Phenazopyridine               | host-guest<br>(CB[7])<br>(Colorimetric<br>) | Water                         | 21 nM            | SP             | NO                         | Urine       | 6       |

|    |                    |                                |       |                                  |         |    |                       |           |
|----|--------------------|--------------------------------|-------|----------------------------------|---------|----|-----------------------|-----------|
| 6. | Gold nanoparticles | Pillar [5]arene (Colorimetric) | Water | 0.034 $\mu$ M                    | SP      | NO | NA                    | 7         |
| 7. | BPBP               | host-guest (CB[7])             | Water | 20.2 ppb (SP),<br>36.3 ppb (SPD) | SP, SPD | NO | blood serum,<br>urine | This work |

BPAs: Biogenic polyamines; SP: Spermine; SPD: Spermidine; PDI: Perylene diimide; TPE: Tetraphenylethylene. <sup>a</sup>Unless otherwise mentioned the LOD presented in the table is for spermine.



**Table S8.** A comparative study for selected supramolecular sensing strategies for SP/SPD.

| Sr. No. | Probe/dye Type                                 | Detection Medium                                                       | Detection Limit (ppb)       | Analyte (BPAs) | Ref. No. |
|---------|------------------------------------------------|------------------------------------------------------------------------|-----------------------------|----------------|----------|
| 1.      | Functionalized MCM-41 loaded with Rhodamine 6G | Water                                                                  | 5463.2 (SP)<br>6545.2 (SPD) | SP and SPD     | 8        |
| 2.      | Ciprofloxacin-Tb <sup>3+</sup> complex         | Water                                                                  | 34.3                        | SP             | 9        |
| 3.      | Doxorubicin-ZnO-cucurbit[7]uril nanocomplex,   | Water                                                                  | Not mentioned               | SP             | 10       |
| 4.      | Quantum dots based nanoprobe                   | Water                                                                  | 40.5 (SP)<br>305 (SPD)      | SP and SPD     | 11       |
| 5.      | Pyrocatechol violet                            | HEPES buffer pH 7                                                      | 1262                        | SP             | 12       |
| 6.      | TPE                                            | Phosphate buffer pH 7.4                                                | 141.7 (SP)<br>170.2 (SPD)   | SP and SPD     | 13       |
| 7.      | PDI-SDS                                        | HEPES-buffered CH <sub>3</sub> CN/H <sub>2</sub> O (1:1, v/v, pH 7.2); | 6.05                        | SP             | 14       |
| 8.      | Squaraine and Pyrene (micelles)                | Water                                                                  | 957                         | SP             | 15       |

|     |                                                                 |                                        |                               |                |                  |
|-----|-----------------------------------------------------------------|----------------------------------------|-------------------------------|----------------|------------------|
| 9.  | Benzothiadiazole polymer-<br>SDS                                | Water                                  | 66.8                          | SP             | 16               |
| 10. | Pyrene amphiphile                                               | (0.8 mM<br>MOPS, pH<br>7.0)            | Not<br>mentioned              | SP             | 17               |
| 11. | CdTe QDs and carbon dots.                                       | phosphate<br>buffer (pH<br>8.0, 10 mM) | 41 (SP)<br>305 (SPD)          | SP and SPD     | 18               |
| 12. | TPE + CB[6]OH + HAp<br>NPs                                      | Water                                  | 1.4                           | SP, SPD        | 19               |
| 13. | <b>BPBP + GQD +CB[7]<br/>affinity-driven guest<br/>exchange</b> | <b>Water</b>                           | <b>0.1 (SP)<br/>0.9 (SPD)</b> | <b>SP, SPD</b> | <b>This work</b> |

SP: Spermine; SPD: Spermidine; PDI: Perylenediimide; TPE: Tetraphenylethylene. <sup>a</sup>Unless otherwise mentioned the LOD presented in the table is for spermine

## References:

1. L. Wang, Y. Wang, T. Xu, H. Liao, C. Yao, Y. Liu, Z. Li, Z. Chen, D. Pan, L. Sun and M. Wu, Gram-scale synthesis of single-crystalline graphene quantum dots with superior optical properties, *Nat Commun.* 2014, **5**, 5357, <https://doi.org/10.1038/ncomms6357>.
2. Y. Cheng, P. Jiang and X. Dong, Molecularly imprinted fluorescent chemosensor synthesized using quinoline-modified- $\beta$ -cyclodextrin as monomer for spermidine recognition, *RSC Adv.* 2015, **5**, 55066–55074, <https://doi.org/10.1039/C5RA07761C>.
3. K. M. Park, J. Kim, Y. H. Ko, Y. Ahn, J. Murray, M. Li, A. Shrinidhi and K. Kim, Dye-cucurbit[n]uril complexes as sensor elements for reliable pattern recognition of biogenic polyamines, *Bull. Chem. Soc. Jpn.* 2018, **91**, 95–99, <https://doi.org/10.1246/bcsj.20170302>.
4. K. Liu, Y. Yao, Y. Kang, Y. Liu, Y. Han, Y. Wang, Z. Li and X. Zhang, A supramolecular approach to fabricate highly emissive smart materials, *Sci. Rep.* 2013, **3**, 2372–2379, <https://doi.org/10.1038/srep02372>.
5. G. Jiang, W. Zhu, Q. Chen, X. Li, G. Zhang, Y. Li, X. Fan and J. Wang, Selective fluorescent probes for spermine and 1-adamantanamine based on the supramolecular structure formed between AIE-active molecule and cucurbit[n]urils, *Sens. Actuators, B* 2018, **261**, 602–607, <https://doi.org/10.1016/j.snb.2018.01.197>.
6. H. Zhang, M. Liu, X. Zhu and H. Li, Detection of spermine using cucurbit[7]uril-phenazopyridine host-guest inclusion complex as a platform, *Chem. Lett.* 2021, **50**, 154–157, <https://doi.org/10.1246/cl.200667>.
7. X. Tan, X. Liu, W. Zeng, Z. Zhang, T. Huang, L. Yu and G. Zhao, Colorimetric sensing towards spermine based on supramolecular pillar[5]arene reduced and stabilized gold nanoparticles, *Spectrochim. Acta, Part A* 2019, **221**, 117176, <https://doi.org/10.1016/j.saa.2019.117176>.

8. M. Barros, A. López-Carrasco, P. Amorós, S. Gil, P. Gaviña, M. Parra, J. E. Haskouri, M. C. Terencio and A. M. Costero, Chromogenic chemodosimeter based on capped silica particles to detect spermine and spermidine, *Nanomaterials* 2021, **11**, 818, <https://doi.org/10.3390/nano11030818>.
9. N. N. Nghia, B. T. Huy, P. T. Phong, J. S. Han, D. H. Kwon and Y. -I. Lee, Simple fluorescence optosensing probe for spermine based on ciprofloxacin-Tb<sup>3+</sup> complexation, *PLoS ONE* 2021, **16**, e0251306, <https://doi.org/10.1371/journal.pone.0251306>.
10. Y. Chen, L. Jing, Q. Meng, B. Li, R. Chen and Z. Sun, Supramolecular chemotherapy: Noncovalent bond synergy of cucurbit[7]uril against human colorectal tumor cells, *Langmuir* 2021, **37**, 9547–9552, <https://doi.org/10.1021/acs.langmuir.1c01422>.
11. S. Abbasi-Moayed, A. Bigdeli and M. R. Hormozi-Nezhad, Determination of spermine and spermidine in meat with ratiometric fluorescence nanoprobe and a combinational logic gate, *Food Chem.* 2022, **384**, 132459, <http://doi.org/10.1016/j.foodchem.2022.132459>.
12. Y. Fukushima, and S. Aikawa, Colorimetric chemosensor for spermine based on pyrocatechol violet and anionic phenylboronic acid in aqueous solution, *Microchem. J.* 2021, **162**, 105867, <http://doi.org/10.1016/j.microc.2020.105867>.
13. M. Barros, S. Ceballos, P. Arroyo, J. A. Sáez, M. Parra, S. Gil, A. M. Costero and P. Gaviña, Spermine and spermidine detection through restricted intramolecular rotations in a tetraphenylethylene derivative, *Chemosensors* 2022, **10**, 8, <https://doi.org/10.3390/chemosensors10010008>.
14. P. Singh, L. S. Mittal, G. Bhargava and S. Kumar, Ionic self-assembled platform of perylenediimide–sodium dodecylsulfate for detection of spermine in clinical samples, *Chem. Asian J.* 2017, **12**, 890–899, <https://doi.org/10.1002/asia.201700120>.

15. J. Tu, S. Sun and Y. Xu, A novel self-assembled platform for the ratiometric fluorescence detection of spermine, *Chem. Commun.* 2016, **52**, 1040–1043, <https://doi.org/10.1039/c5cc07861j>.
16. A. H. Malik, S. Hussain and P. K. Iyer, Aggregation-induced FRET via polymer–surfactant complexation: A new strategy for the detection of spermine, *Anal. Chem.* 2016, **88**, 7358–7364, <https://doi.org/10.1021/acs.analchem.6b01788>.
17. Z. Köstereli and K. Severin, Fluorescence sensing of spermine with a frustrated amphiphile, *Chem. Commun.* 2012, **48**, 5841–5843, <https://doi.org/10.1039/c2cc32228e>.
18. V. G. Naik, V. Kumar, A. C. Bhasikuttan, K. Kadu, S. R. Ramanan, A. A. Bhosle, M. Banerjee and A. Chatterjee, Solid-supported amplification of aggregation emission: A tetraphenylethylene–cucurbit[6]uril@hydroxyapatite-based supramolecular sensing assembly for the detection of spermine and spermidine in human urine and blood, *ACS Appl. Bio Mater.* 2021, **4**, 1813–1822, <https://doi.org/10.1021/acsabm.0c01527>.

### **NMR Spectra:**

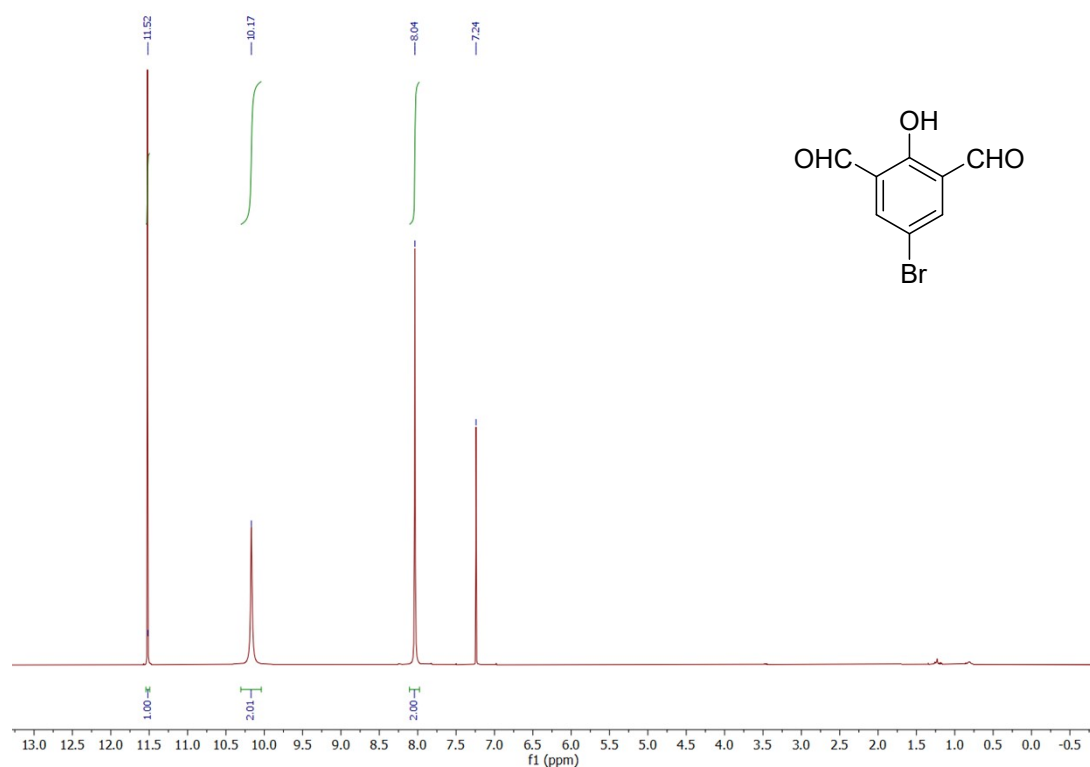

**<sup>1</sup>H NMR spectrum of 5-bromo-2-hydroxyisophthalaldehyde.**

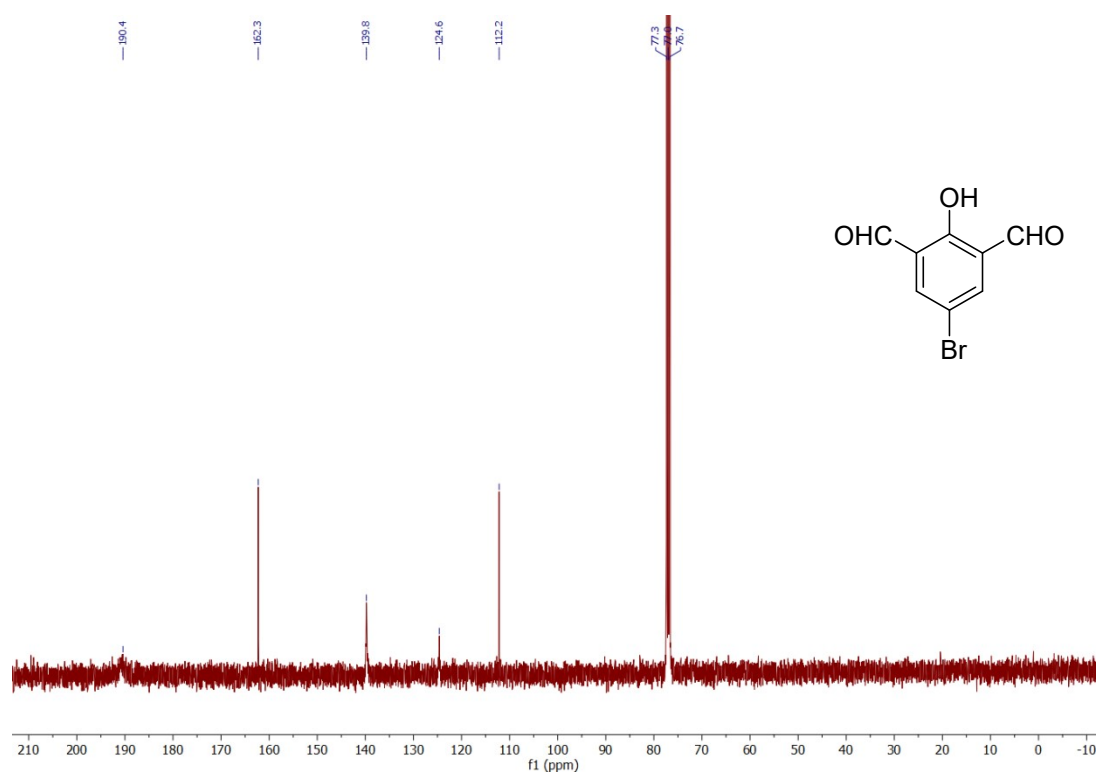

**<sup>13</sup>C NMR spectrum of 5-bromo-2-hydroxyisophthalaldehyde.**

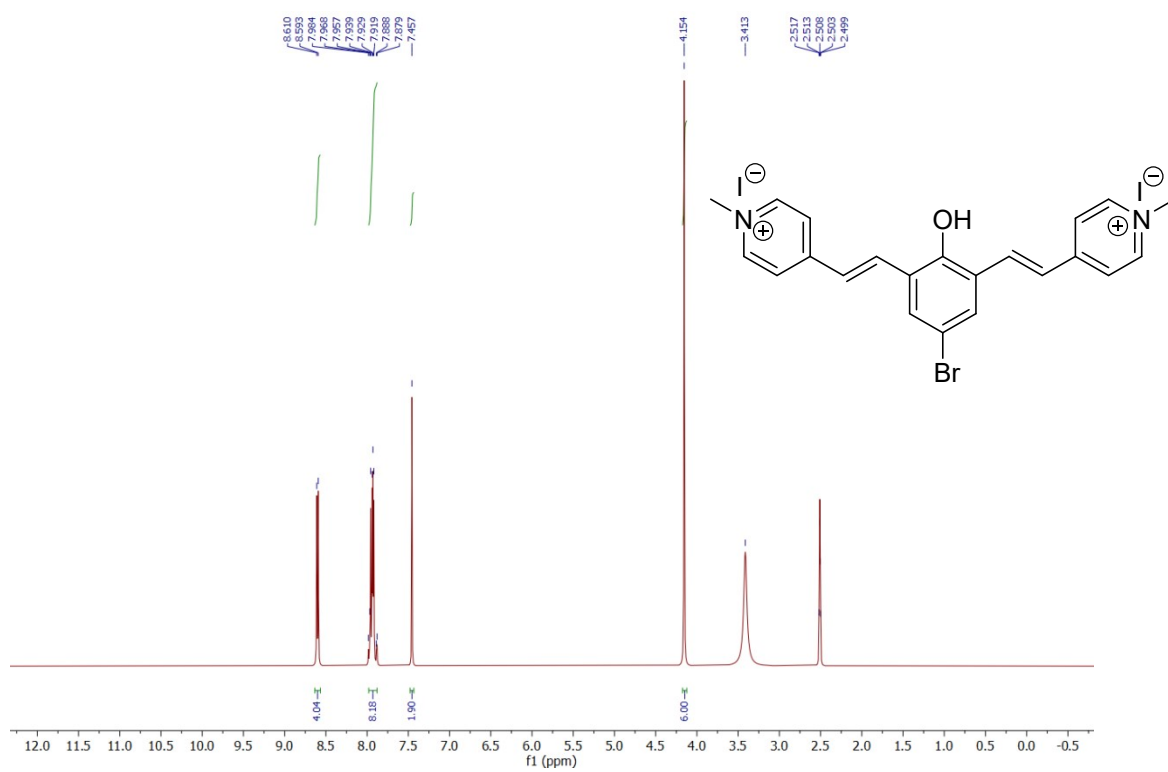

<sup>1</sup>H NMR spectrum of **BPBP**.

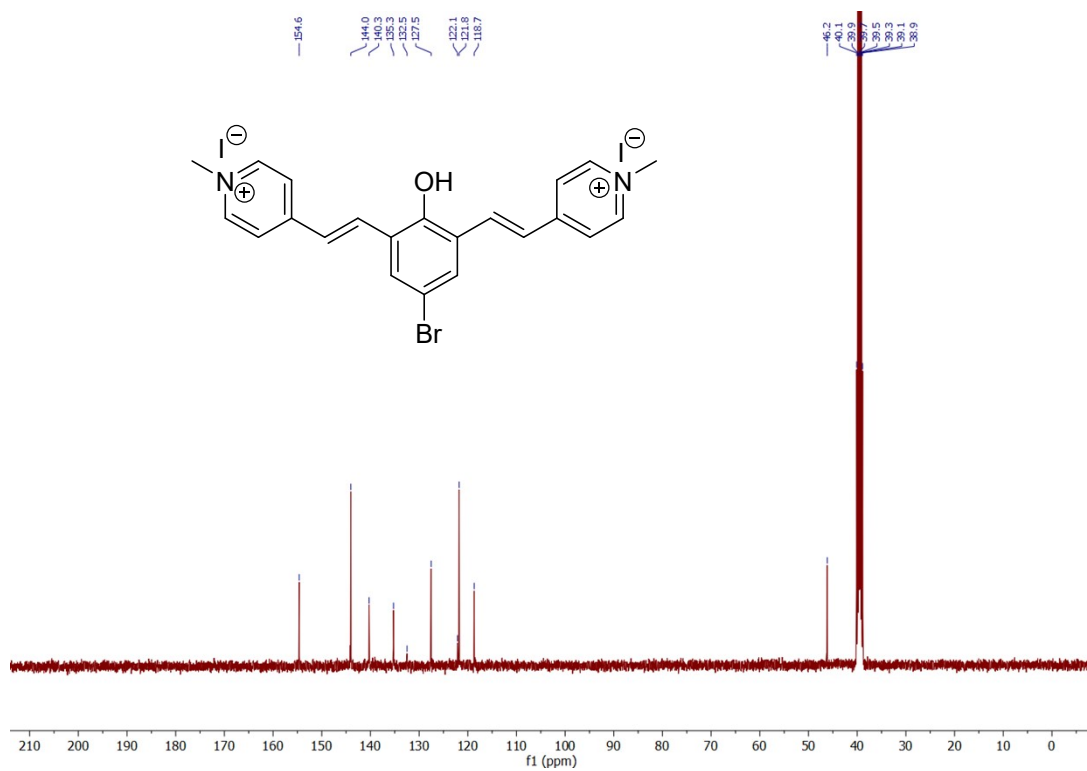

<sup>13</sup>C NMR spectrum of **BPBP**.
